# Supplementary material
Source: Elsevier journal article supplement (https://www.sciencedirect.com/science/article/pii/S1134793720300294)
Supplement: mmc3 [file S1134793720300294:mmc3.docx]

**Appendix C**


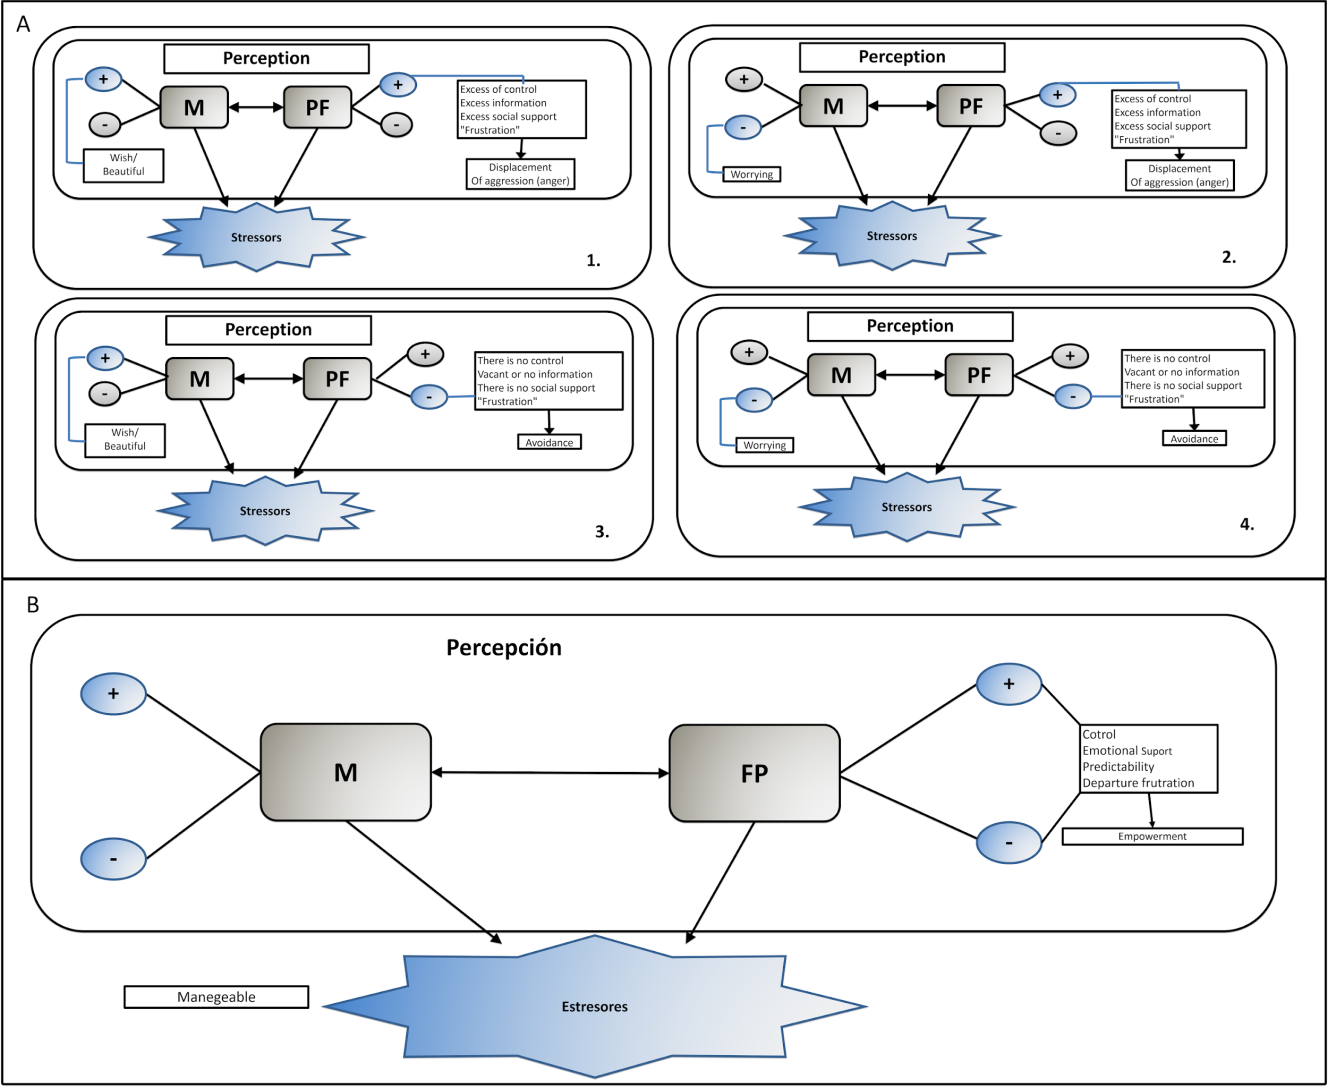


**Figure C.3. Interaction of the three core factors of gestational stress (perception of motherhood, pregnancy stressors and psychological factors).**
